# Supplementary material for: Recent Advances in Small Peptides of Marine Origin in Cancer Therapy
Source: MDPI journal article supplement (doi:10.3390/md19020115), 2021-02-19
Supplement: s1 [file s1]

# Supplementary File

## Recent Advances in Small Peptides of Marine Origin in Cancer Therapy

Qi-Ting Zhang<sup>1</sup>, Ze-Dong Liu<sup>2</sup>, Ze Wang<sup>2</sup>, Tao Wang<sup>1</sup>, Nan Wang<sup>3</sup>, Ning Wang<sup>1,\*</sup>, Bin Zhang<sup>2,\*</sup> and Yu-Fen Zhao<sup>1</sup>

<sup>1</sup> Institute of Drug Discovery Technology, Ningbo University, Ningbo, Zhejiang, 315211, PR China

<sup>2</sup> Li Dak Sum Yip Yio Chin Kenneth Li Marine Biopharmaceutical Research Center, Department of Marine Pharmacy, College of Food and Pharmaceutical Sciences, Ningbo University, Ningbo, Zhejiang, 315800, PR China

<sup>3</sup> Shenzhen Kivita Innovative Drug Discovery Institute, Shenzhen, Guangdong, 518057, PR China

\* Correspondence: wangning2@nbu.edu.cn (N.W.); zhangbin1@nbu.edu.cn (B.Z.)

**Table S1.** Clinical information on Marine small peptide drugs

| Compound                   | Condition or disease                                                                             | ClinicalTrials.gov Identifier: | Clinical Trial  | Status     | Study Completion Date |
|----------------------------|--------------------------------------------------------------------------------------------------|--------------------------------|-----------------|------------|-----------------------|
| E7974                      | Advanced Solid Tumors                                                                            | NCT00165802                    | <b>Phase I</b>  | Completed. | January 2009          |
|                            | Solid Malignancies                                                                               | NCT00130169                    | <b>Phase I</b>  | Completed. | August 2009           |
|                            | Solid Malignancies                                                                               | NCT00121732                    | <b>Phase I</b>  | Completed. | October 2009          |
| HTI-286 (Taltobulin)       | Advanced solid tumours [1]                                                                       | — <sup>a</sup>                 | <b>phase I</b>  | Completed. | 2002                  |
| Dolastatin 10 (NSC#376128) | Metastatic Prostate Cancer                                                                       | NCT00003626                    | <b>Phase II</b> | Completed. | May 2000              |
|                            | Recurrent or Metastatic Soft Tissue Sarcoma                                                      | NCT00003778                    | <b>Phase II</b> | Completed. | July 2000             |
|                            | Refractory or Relapsed Acute Leukemia, Myelodysplastic Syndrome, or Chronic Myelogenous Leukemia | NCT00003693                    | Phase I         | Completed. | October 30, 2001      |
|                            | Metastatic Pancreatic Cancer                                                                     | NCT00003677                    | <b>Phase II</b> | Completed. | January 2002          |
|                            | Indolent Lymphoma, Waldenstrom's Macroglobulinemia, or Chronic Lymphocytic Leukemia              | NCT00005579                    | <b>Phase II</b> | Completed. | February 2003         |
|                            | Metastatic or Recurrent Liver, Bile Duct or Gallbladder Cancer                                   | NCT00003557                    | <b>Phase II</b> | Completed. | August 2003           |
|                            | Advanced Kidney Cancer                                                                           | NCT00003914                    | <b>Phase II</b> | Completed. | May 2009              |
| TZT-1027                   | Progressive Locally Advanced or Metastatic Non-Small Cell Lung Cancer                            | NCT00061854                    | <b>Phase II</b> | Completed. | May 2005              |
|                            | Advanced or Metastatic Soft Tissue Sarcoma                                                       | NCT00064220                    | <b>Phase II</b> | Completed. | December 2005         |
| ILX-651 (Tasidotin)        | Locally Advanced or Metastatic Non-Small Cell, Lung Carcinoma<br>Small Cell, Lung Carcinoma      | NCT00078455                    | <b>Phase II</b> | Completed. | August 2005           |

|                                                                  |                                                                                                          |             |                             |                         |                    |
|------------------------------------------------------------------|----------------------------------------------------------------------------------------------------------|-------------|-----------------------------|-------------------------|--------------------|
|                                                                  | Hormone-Refractory Prostate Cancer Previously Treated with Docetaxel                                     | NCT00082134 | <b>Phase II</b>             | Completed.              | December 2005      |
|                                                                  | Inoperable Locally Advanced or Metastatic Melanoma                                                       | NCT00068211 | <b>Phase II</b>             | Completed.              | January 2006       |
| Cematodin (LU103793)                                             | Refractory Metastatic Solid Tumors [2]                                                                   | -a          | <b>Phase I</b>              | Completed.              | 1996               |
| Glembatumumab vedotin (CDX-011)                                  | Unresectable Stage III or Stage IV Melanoma                                                              | NCT00412828 | <b>Phase I<br/>Phase II</b> | Completed.              | May 2011           |
|                                                                  | Locally Advanced or Metastatic Breast Cancer                                                             | NCT00704158 | <b>Phase I<br/>Phase II</b> | Completed.              | June 2011          |
|                                                                  | Advanced GPNMB-expressing Breast Cancer                                                                  | NCT01156753 | <b>Phase II</b>             | Completed.              | November 2012      |
|                                                                  | Recurrent or Refractory Osteosarcoma                                                                     | NCT02487979 | <b>Phase II</b>             | Completed.              | June 30, 2017      |
|                                                                  | Metastatic or Locally Recurrent Uveal Melanoma                                                           | NCT02363283 | <b>Phase II</b>             | Completed.              | July 2, 2018       |
|                                                                  | Metastatic, gpNMB Over-Expressing Triple Negative Breast Cancer                                          | NCT01997333 | <b>Phase II</b>             | Completed.              | August 7, 2018     |
|                                                                  | gpNMB-Expressing, Advanced or Metastatic SCC of the Lung                                                 | NCT02713828 | <b>Phase I<br/>Phase II</b> | Terminated. Has Results | September 26, 2018 |
|                                                                  | Immunotherapies in Patients with Advanced Melanoma                                                       | NCT02302339 | <b>Phase II</b>             | Terminated. Has Results | October 3, 2018    |
| Brentuximab vedotin (SGN-35, Monomethyl Auristatin E, Adcetris.) | A Brentuximab Vedotin Trial for Patients Who Have Previously Participated in a Brentuximab Vedotin Study | NCT00947856 | <b>Phase II</b>             | Completed.              | March 2013         |
|                                                                  | Relapsed or Refractory Hodgkin Lymphoma                                                                  | NCT00337194 | <b>Phase II</b>             | Completed.              | October 2014       |
|                                                                  | CD30-positive Nonlymphomatous Malignancies                                                               | NCT01461538 | <b>Phase II</b>             | Completed.              | December 2014      |
|                                                                  | Hodgkin Lymphoma                                                                                         | NCT00848926 | <b>Phase II</b>             | Completed.              | May 2015           |
|                                                                  | Relapsed or Refractory Non-Hodgkin                                                                       | NCT01421667 | <b>Phase II</b>             | Completed.              | June 2015          |

|  |                                                                                                            |             |                             |            |                   |
|--|------------------------------------------------------------------------------------------------------------|-------------|-----------------------------|------------|-------------------|
|  | Lymphoma                                                                                                   |             |                             |            |                   |
|  | Mycosis Fungoides With Variable CD30 Expression Level                                                      | NCT01396070 | <b>Phase II</b>             | Completed. | May 2016          |
|  | Systemic Anaplastic Large Cell Lymphoma                                                                    | NCT00866047 | <b>Phase II</b>             | Completed. | June 2016         |
|  | Relapsed or Refractory PMLBCL (FIL_SGN01)                                                                  | NCT02423291 | <b>Phase II</b>             | Completed. | July 2016         |
|  | Hodgkin Lymphoma                                                                                           | NCT01393717 | <b>Phase II</b>             | Completed. | February 1, 2017  |
|  | Advanced Systemic Mastocytosis or Mast Cell Leukemia                                                       | NCT01807598 | <b>Phase II</b>             | Completed. | September 2017    |
|  | Limited-stage Hodgkin Lymphoma                                                                             | NCT01534078 | <b>Phase II</b>             | Completed. | January 2018      |
|  | Hodgkin Lymphoma                                                                                           | NCT01874054 | <b>Phase I<br/>Phase II</b> | Completed. | February 20, 2018 |
|  | Relapsed or Refractory (r/r) Systemic Anaplastic Large-Cell Lymphoma or Hodgkin Lymphoma                   | NCT01492088 | <b>Phase I<br/>Phase II</b> | Completed. | April 12, 2018    |
|  | CD30-Positive Cutaneous T-Cell Lymphoma (ALCANZA Study) (ALCANZA)                                          | NCT01578499 | <b>Phase III</b>            | Completed. | July 6, 2018      |
|  | Non-bulky Limited Stage Hodgkin Lymphoma                                                                   | NCT02505269 | <b>Phase II</b>             | Completed. | June 2019         |
|  | Relapsed/Refractory CD30-Positive Hodgkin Lymphoma (HL) or Systemic Anaplastic Large Cell Lymphoma (sALCL) | NCT02939014 | <b>Phase II</b>             | Completed  | February 3, 2020  |
|  | High Risk of Residual Hodgkin Lymphoma Following Stem Cell Transplant (The AETHERA Trial)                  | NCT01100502 | <b>Phase III</b>            | Completed. | April 27, 2020    |
|  | CD30+ PMBL, Diffuse Large B-Cell, and Grey Zone Lymphoma Patients                                          | NCT01994850 | <b>Phase I<br/>Phase II</b> | Completed. | January 5, 2021   |

|                                  |                                                                                               |             |                             |                         |               |
|----------------------------------|-----------------------------------------------------------------------------------------------|-------------|-----------------------------|-------------------------|---------------|
|                                  | Relapsed or Refractory Hodgkin Lymphoma                                                       | NCT01990534 | <b>Phase IV</b>             | Completed.              | June 10, 2021 |
| Didemnin B (NSC 325319)          | Advanced Epithelial Ovarian Cancer [3].                                                       | –a          | <b>Phase II</b>             | Completed.              | 1992          |
|                                  | Metastatic Breast Cancer [4].                                                                 | –a          | <b>Phase I</b>              | Completed.              | 1992          |
|                                  | Myeloma. A Cancer and Leukemia [5].                                                           | –a          | <b>phase II</b>             | Completed.              | 1994          |
|                                  | Advanced Malignant Melanoma [6]                                                               | –a          | <b>phase II</b>             | Completed               | 1998          |
|                                  | Central Nervous System Tumors [7]                                                             | –a          | <b>Phase II</b>             | Completed.              | 1999          |
|                                  | Recurrent or Refractory Anaplastic Astrocytoma or Glioblastoma Multiforme [8]                 | –a          | <b>Phase II</b>             | Completed.              | 1999          |
|                                  | Previously Treated Non-Hodgkin's lymphoma [9]                                                 | –a          | <b>Phase II</b>             | Completed               | 2000          |
| Aplidine<br>(Dehydroididemnin B) | Advanced Prostate Cancer                                                                      | NCT00780975 | <b>Phase II</b>             | Terminated. Has Results | March 2008    |
|                                  | Relapsing or Refractory Multiple Myeloma                                                      | NCT00229203 | <b>Phase II</b>             | Completed.              | August 2008   |
|                                  | Relapsed/Refractory Leukemia                                                                  | NCT00780143 | <b>Phase I<br/>Phase II</b> | Completed.              | June 2009     |
|                                  | Relapsed/Refractory Aggressive Non Hodgkin Lymphoma                                           | NCT00884286 | <b>Phase II</b>             | Terminated. Has Results | June 2010     |
|                                  | Primary Myelofibrosis                                                                         | NCT01149681 | <b>Phase II</b>             | Terminated. Has Results | February 2011 |
|                                  | Advanced Solid Tumors or Lymphomas                                                            | NCT00788099 | <b>Phase I</b>              | Completed.              | June 2011     |
|                                  | Advanced Unresectable or Metastatic, Relapsed/Refractory, Dedifferentiated Liposarcoma (DLPS) | NCT01876043 | <b>Phase II</b>             | Terminated. Has Results | April 2015    |
|                                  | Relapsed/Refractory Myeloma (ADMYRE)                                                          | NCT01102426 | <b>Phase III</b>            | Completed.              | November 2017 |
|                                  | Multiple Myeloma                                                                              | NCT02100657 | <b>Phase I</b>              | Completed.              | June 2018     |
|                                  | Multiple Myeloma Patients Double Refractory to Bortezomib and Lenalidomide                    | NCT03117361 | <b>Phase II</b>             | Completed.              | July 2018     |

|            |                                                                                             |                |                             |                         |                |
|------------|---------------------------------------------------------------------------------------------|----------------|-----------------------------|-------------------------|----------------|
|            | Relapsed or Refractory Angioimmunoblastic T-cell Lymphoma                                   | NCT03070964    | <b>Phase II</b>             | Terminated. Has Results | July 2018      |
|            | COVID-19 (APLICOV-PC)                                                                       | NCT04382066    | <b>Phase I</b>              | Completed.              | December 2020  |
| Plinabulin | Advanced Solid Tumors or Lymphoma                                                           | NCT00322608    | <b>Phase I</b>              | Completed.              | December 2009  |
|            | Advanced Non-Small Cell Lung Cancer                                                         | NCT00630110    | <b>Phase I<br/>Phase II</b> | Completed.              | June 2011      |
|            | Solid Tumors Receiving Docetaxel Myelosuppressive Chemotherapy Phase 2                      | NCT04345900    | <b>Phase II</b>             | Completed.              | April 2018     |
|            | Stage IIIB-IV, Recurrent, or Metastatic Non-small Cell Lung Cancer                          | NCT02846792    | <b>Phase I<br/>Phase II</b> | Terminated. Has Results | August 2018    |
|            | TAC Induced Neutropenia                                                                     | NCT04227990    | <b>Phase II</b>             | Completed.              | January 2019   |
|            | Advanced NSCLC (DUBLIN-3)                                                                   | NCT02504489    | <b>Phase III</b>            | Recruiting.             | November 2020  |
|            | Solid Tumors Receiving Docetaxel Myelosuppressive Chemotherapy Phase 3 (Protective-1)       | NCT03102606    | <b>Phase III</b>            | Active, not recruiting. | December 2020  |
|            | Recurrent Small Cell Lung Cancer                                                            | NCT03575793    | <b>Phase I<br/>Phase II</b> | Recruiting.             | September 2022 |
|            | Metastatic Non-Small Cell Lung Cancer (NSCLC)                                               | NCT02812667    | <b>Phase I</b>              | Recruiting.             | December 2022  |
|            | Prevention of TAC Induced Neutropenia                                                       | NCT03294577    | <b>Phase III</b>            | Active, not recruiting. | September 2025 |
| Halimide   | Advanced, Metastatic Non-small Cell Lung Cancer [10]                                        | - <sup>a</sup> | <b>Phase II</b>             | Completed.              | 2015           |
| LY355703   | Inhibits the Growth of Various Tumour Cells [11]                                            | - <sup>a</sup> | <b>Phase II</b>             | Completed.              | 1998           |
|            | Phase I and pharmacological Studies of the Cryptophycin Analogue LY355703 Administered [12] | - <sup>a</sup> | <b>Phase I</b>              | Completed.              | 2002           |

Notes: -<sup>a</sup> Data not mentioned.

## References

1. Ratain, M.J.; Undevia, S.; Janisch, L.; Roman, S.; Mayer, P.; Buckwalter, M.; Foss, D.; Hamilton, B.L.; Fischer, J.; Bukowski, R.M. Phase I and pharmacological study of HTI-286, a novel antimicrotubule agent: correlation of neutropenia with time above threshold plasma concentration. *Proc Am Soc Clin Oncol*, **2003**, *129*, abstract 516.
2. Poruchynsky, M.S.; Kim, J.H.; Nogales, E.; Annable, T.; Loganzo, F.; Greenberger, L.M.; Sackett, D.L.; Fojo, T. Tumor cells resistant to a microtubule-depolymerizing hemiasterlin analogue, HTI-286, have mutations in alpha- or beta-tubulin and increased microtubule stability. *Biochemistry* **2004**, *43*, 13944-13954, doi:10.1021/bi049300+.
3. Cain, J.M.; Liu, P.Y.; Alberts, D.E.; Gallion, H.H.; Laufman, L.; O'Sullivan, J.; Weiss, G.; Bickers, J.N. Phase II trial of didemnin-B in advanced epithelial ovarian cancer. A Southwest Oncology Group study. *Invest New Drugs* **1992**, *10*, 23-24, doi:10.1007/bf01275473.
4. Benvenuto, J.A.; Newman, R.A.; Bignami, G.S.; Raybould, T.J.; Raber, M.N.; Esparza, L.; Walters, R.S. Phase II clinical and pharmacological study of didemnin B in patients with metastatic breast cancer. *Invest New Drugs* **1992**, *10*, 113-117, doi:10.1007/bf00873128.
5. Weiss, R.B.; Peterson, B.L.; Allen, S.L.; Browning, S.M.; Duggan, D.B.; Schiffer, C.A. A phase II trial of didemnin B in myeloma. A cancer and leukemia group B (CALGB) study. *Invest. New Drugs* **1994**, *12*, 41-43, doi:10.1007/bf00873234.
6. Hochster, H.; Oratz, R.; Ettinger, D.S.; Borden, E. A phase II study of Didemnin B (NSC 325319) in advanced malignant melanoma: an eastern cooperative oncology group study (PB687). *Invest New Drugs* **1998**, *16*, 259-263, doi:10.1023/a:1006110431250.
7. Taylor, S.A.; Giroux, D.J.; Jaeckle, K.A.; Panella, T.J.; Dakhil, S.R.; Schold, S.C. Phase II study of Didemnin B in central nervous system tumors: a southwest oncology group study. *Invest New Drugs* **1998**, *16*, 331-332, doi:10.1023/a:1006273214056.
8. Mittelman, A.; Chun, H.G.; Puccio, C.; Coombe, N.; Lansen, T.; Ahmed, T. Phase II clinical trial of didemnin B in patients with recurrent or refractory anaplastic astrocytoma or glioblastoma multiforme (NSC 325319). *Invest New Drugs* **1999**, *17*, 179-182, doi:10.1023/a:1006379402114.
9. Kucuk, O.; Young, M.L.; Habermann, T.M.; Wolf, B.C.; Jimeno, J.; Cassileth, P.A. Phase II trail of didemnin B in previously treated non-Hodgkin's lymphoma: an eastern cooperative oncology group (ECOG) study. *Am J Clin Oncol* **2000**, *23*, 273-277, doi:10.1097/00000421-200006000-00013.
10. Millward, M.; Mainwaring, P.; Mita, A.; Federico, K.; Lloyd, G.K.; Reddinger, N.; Nawrocki, S.; Mita, M.; Spear, M.A. Phase 1 study of the novel vascular disrupting agent plinabulin (NPI-2358) and docetaxel. *Invest. New Drugs* **2012**, *30*, 1065-1073, doi:10.1007/s10637-011-9642-4.
11. Mooberry, S.L.; Busquets, L.; Tien, G. Induction of apoptosis by cryptophycin 1, a new antimicrotubule agent. *Int. J. Cancer* **1997**, *73*, 440-448, doi:10.1002/(sici)1097-0215(19971104)73:3<440::aid-ijc20>3.0.co;2-f.

12. Sessa, C.; Weigang-Köhler, K.; Pagani, O.; Greim, G.; Mora, O.; De Pas, T.; Burgess, M.; Weimer, I.; Johnson, R. Phase I and pharmacological studies of the cryptophycin analogue LY355703 administered on a single intermittent or weekly schedule. *Eur. J. Cancer* **2002**, *38*, 2388-2396, doi:10.1016/s0959-8049(02)00489-6.
